# Supplementary material
Source: publisher figshare collection journal article supplement (https://frontiersin.figshare.com/ndownloader/files/22202613)
Supplement: Supplementary file [file 22202613]

**Supplement Table 1. Media composition evaluated for  
gynogenic induction in cassava**

| Components                                            | Medium           |                 |                  |                  |                  |
|-------------------------------------------------------|------------------|-----------------|------------------|------------------|------------------|
|                                                       | CBM <sup>a</sup> | A1 <sup>b</sup> | F6 <sup>b</sup>  | BDS <sup>c</sup> | R <sup>b</sup>   |
| Based on                                              | CBM <sup>a</sup> | B5 <sup>d</sup> | BDS <sup>e</sup> | BDS <sup>e</sup> | BDS <sup>e</sup> |
| Macro- and micro-elements (mg/L)                      |                  |                 |                  |                  |                  |
| KNO <sub>3</sub>                                      | 950              | 2500            | 2530             | 2530             | 2530             |
| NH <sub>4</sub> NO <sub>3</sub>                       | 450              | -               | 320              | 320              | 320              |
| (NH <sub>4</sub> ) <sub>2</sub> SO <sub>4</sub>       | 17.5             | 134             | 134              | 134              | 134              |
| Ca(NO <sub>3</sub> ) <sub>2</sub> x 4H <sub>2</sub> O | 25               | -               | -                | -                | -                |
| MgSO <sub>4</sub> x 7H <sub>2</sub> O                 | 185              | 249             | 247              | 247              | 247              |
| NaH <sub>2</sub> PO <sub>4</sub> .H <sub>2</sub> O    | 19               | -               | -                | -                | -                |
| NaH <sub>2</sub> PO <sub>4</sub> .2H <sub>2</sub> O   | -                | 170             | 172              | 172              | 172              |
| KH <sub>2</sub> PO <sub>3</sub>                       | 75               | -               | -                | -                | -                |
| KCl                                                   | 3.5              | -               | -                | -                | -                |
| NH <sub>4</sub> H <sub>2</sub> PO <sub>4</sub>        | -                | -               | 230              | 230              | 230              |
| CaCl <sub>2</sub>                                     | 160              | -               | -                | -                | -                |
| CaCl <sub>2</sub> x 2H <sub>2</sub> O                 | -                | 150             | 150              | 150              | 150              |
| MnSO <sub>4</sub> x 4H <sub>2</sub> O                 | -                | -               | 13.2             | 13.2             | 13.2             |
| ZnSO <sub>4</sub> x H <sub>2</sub> O                  | 4                | 10              | -                | -                | -                |
| ZnSO <sub>4</sub> x 7H <sub>2</sub> O                 | -                | -               | 2                | 2                | 2                |
| H <sub>3</sub> BO <sub>3</sub>                        | 4                | 2               | 3                | 3                | 3                |
| KI                                                    | 0.7              | 3               | 0,75             | 0,75             | 0,75             |
| CuSO <sub>4</sub> x 5H <sub>2</sub> O                 | 0.016            | 0,75            | 0,039            | 0,039            | 0,039            |
| Na <sub>2</sub> MoO <sub>4</sub> x H <sub>2</sub> O   | -                | 0,025           | -                | -                | -                |
| Na <sub>2</sub> MoO <sub>4</sub> x 2H <sub>2</sub> O  | 0.2              | -               | 0,25             | 0,25             | 0,25             |
| CoCl <sub>2</sub> x 6H <sub>2</sub> O                 | 0.016            | 0,025           | 0,025            | 0,025            | 0,025            |
| FeSO <sub>4</sub> x 7H <sub>2</sub> O                 | 27.85            | 27.85           | 27.85            | 27.85            | 27.85            |
| Na <sub>2</sub> -EDTA                                 | 37.85            | 37.85           | 37.85            | 37.85            | 37.85            |

**Supplement Table 1.** Continued

| Components                                              | Medium           |                 |                  |                  |                  |
|---------------------------------------------------------|------------------|-----------------|------------------|------------------|------------------|
|                                                         | CBM <sup>a</sup> | A1 <sup>b</sup> | F6 <sup>b</sup>  | BDS <sup>c</sup> | R <sup>b</sup>   |
| Based on                                                | CBM <sup>a</sup> | B5 <sup>d</sup> | BDS <sup>e</sup> | BDS <sup>e</sup> | BDS <sup>e</sup> |
| Vitamins, amino acids, other organic supplements (mg/L) |                  |                 |                  |                  |                  |
| Nicotinic acid                                          | 1                | 1               | 1                | 1                | 1                |
| pyridoxine                                              | 2                | 1               | 1                | 1                | 1                |
| thiamine                                                | 1                | 2               | 2                | 10               | 2                |
| glycine                                                 | 0.1              | 2               | -                | -                | -                |
| folic acid                                              | 1                | 1               | -                | -                | -                |
| Ca-pantothenate                                         | 0.5              | 1               | 1                | -                | 1                |
| Biotin                                                  | 0.05             | 0.01            | -                | -                | -                |
| L-proline                                               | -                | -               | -                | 200              | 200              |
| adenine                                                 | -                | -               | -                | -                | 10               |
| Myo-inositol                                            | 80               | 100             | 100              | 500              | 500              |
| Sucrose                                                 | 100000           |                 | 100000           | 100000           | 100000           |
| 2,4-D                                                   | 2                | -               | 2                | 2                | -                |
| NAA                                                     | -                | -               | -                | -                | 1                |
| BAP                                                     | 2                | -               | 2                | 2                | -                |
| 2ip                                                     | -                | -               | -                | -                | 2                |
| Gelrite                                                 |                  |                 | 4 g              |                  |                  |

<sup>a</sup> Gémes-Juhász et al. (2002)<sup>b</sup> Michalik et al. (2000)<sup>c</sup> Bohanec, B., and Jakse, M. (1999)<sup>d</sup> Gamborg et al. (1968)<sup>e</sup> Dunstan and Short (1977)
